# Supplementary material for: Caloric restriction promotes beta cell longevity and delays aging and senescence signatures.
Source: Research Square preprint supplement (doi:10.21203/rs.3.rs-3311459/v1), 2023-09-20
Supplement: Supplementary file 3 [file SuppTable7_ROC_analysis_AL_versus_CR_May302023.xlsx]

## Sheet: Sheet1
m/z	MASS without range	Name	MolecularClass	Pearson_AcinarRegion_Allsamples	Pearson_AllIslets_AllSamples	Pearson_Islet465mz_AllSamples	ROC_Acinar_vs_Islet_May30	ROC_AL_islets_vs_CR_islets
303.23266 m/z ± 0.00066 Da	303.23266	not identified		-0.0127218	0.208751	0.241406	0.0707785	0.898008
304.23636 m/z ± 0.00565 Da	304.23636	not identified		0.0134	0.182033	0.208809	0.0779057	0.881404
885.54866 m/z ± 0.00565 Da	885.54866	not identified		0.00864354	0.173644	0.187412	0.0693531	0.860006
766.53786 m/z ± 0.00565 Da	766.53786	phosphatidylethanolamine	Cell Component	0.0072062	0.215951	0.248155	0.0652961	0.855664
327.23271 m/z ± 0.00565 Da	327.23271	phosphatidylethanolamine	Cell Component	-0.00599581	0.294621	0.330807	0.0238487	0.854461
723.49511 m/z ± 0.00565 Da	723.49511	not identified		0.00193313	0.287967	0.337293	0.0360746	0.852888
886.55187 m/z ± 0.00565 Da	886.55187	PA(20:3(8Z,11Z,14Z)/18:1(9Z))	Lipid	0.014061	0.168736	0.181442	0.0758224	0.837575
305.24874 m/z ± 0.00565 Da	305.24874	Unknown long chain fatty acid	Lipid	-0.0515885	0.24559	0.279879	0.174726	0.808051
767.54028 m/z ± 0.00565 Da	767.54028	not identified		-0.0581498	0.22949	0.252153	0.168257	0.796529
528.27206 m/z ± 0.00565 Da	528.27206	not identified		-0.0593938	0.361741	0.413685	0.210526	0.767519
770.56762 m/z ± 0.00565 Da	770.56762	phosphatidylethanolamine	Lipid	0.0571438	0.062456	0.0603786	0.341941	0.7549
887.55166 m/z ± 0.00565 Da	887.55166	not identified		-0.0415078	0.140555	0.147206	0.220175	0.715965
724.49982 m/z ± 0.00565 Da	724.49982	not identified		-0.0687363	0.37778	0.415535	0.236842	0.712544
725.51112 m/z ± 0.00565 Da	725.51112	PA(20:3(8Z,11Z,14Z)/18:0)	Lipid	-0.044086	0.324026	0.363306	0.239857	0.710244
325.18423 m/z ± 0.00153 Da	325.18423	not identified		-0.125448	-0.041631	-0.0443645	0.542708	0.671247
311.16863 m/z ± 0.0014 Da	311.16863	N-Undecylbenzenesulfonic acid	Cell Component	-0.12477	-0.0418956	-0.0445421	0.526864	0.670721
508.34012 m/z ± 0.00565 Da	508.34012	lysophospholipid	Lipid	-0.011392	0.239453	0.262017	0.076864	0.669762
415.22559 m/z ± 0.00187 Da	415.22559	CPA(18:2(9Z,12Z)/0:0)	Lipid	0.129376	0.00064629	-0.00213116	0.717873	0.666848
883.53212 m/z ± 0.00565 Da	883.53212	Phosphatidylinositol	Lipid	0.0182523	0.134846	0.132842	0.215077	0.662262
442.77505 m/z ± 0.00565 Da	442.77505	not identified		-0.0679631	0.130152	0.140786	0.267599	0.654486
384.13787 m/z ± 0.0016 Da	384.13787	not identified		-0.0910377	-0.0170397	-0.0107412	0.413651	0.650896
371.13831 m/z ± 0.00565 Da	371.13831	not identified		-0.0823618	-0.0129021	-0.00774938	0.429934	0.637726
768.55385 m/z ± 0.00565 Da	768.55385	not identified		-0.00644716	0.0216638	0.0177134	0.436458	0.636579
465.30443 m/z ± 0.00565 Da	465.30443	Cholesterol sulfate	Lipid	-0.0570839	0.843575	1	0.0157895	0.627287
384.03243 m/z ± 0.00565 Da	384.03243	not identified		0.0237797	0.161981	0.182006	0.310746	0.622287
339.19986 m/z ± 0.00104 Da	339.19986	not identified		-0.120673	-0.0460734	-0.0505263	0.635307	0.620595
370.13467 m/z ± 0.00198 Da	370.13467	not identified		-0.0870238	-0.0141727	-0.00888288	0.413596	0.612625
439.22569 m/z ± 0.00565 Da	439.22569	not identified		-0.076791	0.13975	0.15239	0.388213	0.612331
323.02823 m/z ± 0.00075 Da	323.02823			0.0962996	-0.0523396	-0.0422676	0.753235	0.599818
404.01436 m/z ± 0.00565 Da	404.01436			-0.0431919	0.18038	0.218714	0.286458	0.598415
695.46446 m/z ± 0.00565 Da	695.46446			0.0773019	-0.00956979	-0.0213251	0.581689	0.596786
699.49631 m/z ± 0.00565 Da	699.49631			0.132624	0.0457144	0.0597924	0.476096	0.593985
385.14563 m/z ± 0.00241 Da	385.14563			-0.105961	-0.0277475	-0.0254041	0.442654	0.59369
386.149 m/z ± 0.00565 Da	386.149 m			-0.100969	-0.0257204	-0.023464	0.446491	0.589474
279.23294 m/z ± 0.0007 Da	279.23294			0.126476	-0.0946446	-0.113576	0.941941	0.575363
745.55774 m/z ± 0.00565 Da	745.55774			-0.0330171	0.487947	0.52021	0.104605	0.573409
606.07323 m/z ± 0.00565 Da	606.07323			0.123495	-0.0974236	-0.116231	0.852796	0.571147
744.55185 m/z ± 0.00565 Da	744.55185			0.0864714	0.368331	0.412268	0.0284539	0.570896
687.54373 m/z ± 0.00565 Da	687.54373			-0.0563587	0.467942	0.549629	0.0373904	0.570846
280.23625 m/z ± 0.00565 Da	280.23625			0.130044	-0.0658661	-0.0826468	0.922478	0.570833
402.99467 m/z ± 0.00147 Da	402.99467			0.00342929	-0.121577	-0.130931	0.878399	0.570627
700.49919 m/z ± 0.00565 Da	700.49919			0.140561	0.0319696	0.0294392	0.414638	0.565777
297.15293 m/z ± 0.00565 Da	297.15293			-0.128876	-0.0426727	-0.0467791	0.551864	0.561059
346.05599 m/z ± 0.0013 Da	346.05599			0.117169	0.100783	0.131028	0.267544	0.561059
742.53624 m/z ± 0.00565 Da	742.53624			0.12236	-0.0940431	-0.110136	0.911623	0.56015
721.48087 m/z ± 0.00565 Da	721.48087			-0.0622461	0.0190364	0.0210331	0.479057	0.555263
329.24844 m/z ± 0.00565 Da	329.24844			-0.0670228	0.162739	0.192776	0.371382	0.552099
443.27666 m/z ± 0.00565 Da	443.27666			-0.0609804	0.0427127	0.0372816	0.478947	0.551535
403.26158 m/z ± 0.00565 Da	403.26158			-0.0406455	0.497017	0.571114	0.0345395	0.551378
857.51797 m/z ± 0.00565 Da	857.51797			-0.0513066	-0.0259423	-0.0286194	0.554934	0.548528
764.52187 m/z ± 0.00565 Da	764.52187			-0.0568363	0.0504975	0.0535436	0.468421	0.54765
289.02879 m/z ± 0.00565 Da	289.02879			-0.112851	-0.0478974	-0.0534322	0.528838	0.547343
347.05919 m/z ± 0.00565 Da	347.05919			0.128074	0.084832	0.108611	0.287226	0.546604
400.13263 m/z ± 0.00565 Da	400.13263			-0.103141	-0.0131511	-0.00797833	0.478947	0.543509
771.57201 m/z ± 0.00565 Da	771.57201			-0.0371501	0.0108314	0.00490456	0.489254	0.538127
307.2642 m/z ± 0.00565 Da	307.2642			-0.0469198	-0.0106647	-0.0176988	0.500219	0.532895
698.48397 m/z ± 0.00565 Da	698.48397			0.0614652	-0.0598352	-0.073405	0.636568	0.531999
743.54068 m/z ± 0.00565 Da	743.54068			0.127653	-0.0847922	-0.106369	0.903728	0.531529
884.53642 m/z ± 0.00565 Da	884.53642			-0.0651421	0.0844313	0.0803187	0.460691	0.52864
376.23417 m/z ± 0.00565 Da	376.23417			-0.0299181	-0.00707922	0.00427691	0.5	0.526316
786.52722 m/z ± 0.00565 Da	786.52722			0.00172054	-0.0178104	-0.0238595	0.540844	0.525902
565.04689 m/z ± 0.00565 Da	565.04689			-0.014028	-0.0540572	-0.062201	0.558443	0.525
448.00357 m/z ± 0.00565 Da	448.00357			-0.0606722	0.0588943	0.0616147	0.353673	0.524236
326.18739 m/z ± 0.00565 Da	326.18739			-0.134559	-0.0415644	-0.0461379	0.505373	0.52411
301.21749 m/z ± 0.00565 Da	301.21749			-0.0112455	0.0534786	0.0536156	0.474013	0.522694
393.24074 m/z ± 0.00565 Da	393.24074			-0.00753836	-0.0255219	-0.0224337	0.521382	0.522675
424.97638 m/z ± 0.00565 Da	424.97638			-0.0488579	-0.035066	-0.0405322	0.526261	0.521053
859.53204 m/z ± 0.00565 Da	859.53204			0.0408198	-0.0621109	-0.0756613	0.601809	0.520382
402.14409 m/z ± 0.00565 Da	402.14409			-0.0983625	-0.0182721	-0.0159252	0.483936	0.520175
577.21327 m/z ± 0.00565 Da	577.21327			-0.0746586	-0.0157681	-0.0232668	0.489474	0.519737
312.17216 m/z ± 0.00565 Da	312.17216			-0.135579	-0.041927	-0.0465706	0.49989	0.518421
362.05061 m/z ± 0.00565 Da	362.05061			0.186706	0.0508139	0.0623567	0.428564	0.518409
419.25361 m/z ± 0.00127 Da	419.25361			-0.0335216	-0.00946688	-0.0171212	0.510417	0.517901
833.51822 m/z ± 0.00565 Da	833.51822			0.00560169	-0.0352978	-0.0432709	0.558717	0.517262
303.23133 m/z ± 0.00066 Da	303.23133			-0.027362	0.000111758	-0.00822289	0.523794	0.517224
792.52822 m/z ± 0.00565 Da	792.52822			-0.0405139	-0.0308837	-0.0365805	0.510746	0.517105
401.13729 m/z ± 0.00174 Da	401.13729			-0.0752971	-0.0188154	-0.0231555	0.494737	0.517105
417.23805 m/z ± 0.00126 Da	417.23805			0.000620388	-0.0290245	-0.0377874	0.521601	0.516366
420.25723 m/z ± 0.00128 Da	420.25723			-0.00680514	0.0141036	0.00723084	0.489309	0.515539
415.22186 m/z ± 0.00187 Da	415.22186			-0.00600363	-0.00861131	-0.014946	0.5	0.512506
402.99174 m/z ± 0.00147 Da	402.99174			-0.0340117	-0.0406922	-0.0481875	0.542434	0.512074
256.77684 m/z ± 0.005 Da	256.77684			-0.116064	-0.0355558	-0.0409256	0.5	0.511842
265.14802 m/z ± 0.00565 Da	265.14802			-0.037733	-0.0143175	-0.0136865	0.5	0.511178
389.20986 m/z ± 0.00565 Da	389.20986			-0.00485286	-0.0146871	-0.0191813	0.494518	0.510927
273.03369 m/z ± 0.00565 Da	273.03369			-0.102434	-0.0293596	-0.033055	0.494737	0.510727
460.28239 m/z ± 0.00565 Da	460.28239			-0.0050645	-0.0213302	-0.0276253	0.516064	0.510526
293.17923 m/z ± 0.00565 Da	293.17923			-0.035132	-0.0122885	-0.0111097	0.5	0.509405
371.26962 m/z ± 0.00565 Da	371.26962			-0.0541549	-0.0152694	-0.0204922	0.489474	0.509211
391.22265 m/z ± 0.0011 Da	391.22265			-0.0206261	-0.0121058	-0.0203781	0.52182	0.508446
519.14851 m/z ± 0.00565 Da	519.14851			-0.111778	-0.0328584	-0.0361191	0.5	0.508133
272.95702 m/z ± 0.00565 Da	272.95702			0.0597672	-0.0616594	-0.0721746	0.625768	0.508095
324.03176 m/z ± 0.00565 Da	324.03176			0.0112298	-0.0317182	-0.0340234	0.541886	0.507895
372.14141 m/z ± 0.00565 Da	372.14141			-0.0808531	-0.022948	-0.0275744	0.494737	0.507895
579.29414 m/z ± 0.00565 Da	579.29414			0.00252768	-0.0380564	-0.0492295	0.510307	0.507124
399.12494 m/z ± 0.00403 Da	399.12494			-0.0545615	-0.0162796	-0.0210212	0.5	0.506579
340.20332 m/z ± 0.00565 Da	340.20332			-0.125437	-0.0379087	-0.0430806	0.505208	0.505526
1383.38227 m/z ± 0.00691 Da	1383.3822			-0.000343631	0.00882921	0.00841609	0.489364	0.505345
385.13866 m/z ± 0.00214 Da	385.13866			-0.0713985	-0.0214144	-0.0228464	0.5	0.505263
254.77993 m/z ± 0.00492 Da	254.77993			-0.109898	-0.0340696	-0.0389042	0.5	0.505263
436.25427 m/z ± 0.00565 Da	436.25427			-0.000640921	-0.0209409	-0.0263052	0.505318	0.504167
836.53349 m/z ± 0.00565 Da	836.53349			-0.00654421	-0.0276666	-0.033558	0.520833	0.503947
672.46807 m/z ± 0.00565 Da	672.46807			-0.00982223	-0.0165338	-0.019967	0.505263	0.503947
370.13863 m/z ± 0.00198 Da	370.13863			-0.0527037	-0.0148157	-0.0182601	0.5	0.503947
339.19778 m/z ± 0.00104 Da	339.19778			-0.0736486	-0.0214219	-0.0249993	0.5	0.503947
384.13467 m/z ± 0.0016 Da	384.13467			-0.0727616	-0.0219327	-0.026345	0.5	0.503947
369.1271 m/z ± 0.00565 Da	369.1271			-0.0990326	-0.0294006	-0.03223	0.5	0.503947
258.77387 m/z ± 0.00483 Da	258.77387			-0.108504	-0.0337681	-0.0383597	0.5	0.503947
740.52162 m/z ± 0.00565 Da	740.52162			0.0989354	-0.0893194	-0.107039	0.689912	0.503622
241.0121 m/z ± 0.00565 Da	241.0121			-0.0183232	-0.019958	-0.0281848	0.515351	0.503139
714.50654 m/z ± 0.00565 Da	714.50654			0.0760686	-0.0474465	-0.0557926	0.592873	0.50287
553.2778 m/z ± 0.00565 Da	553.2778			0.0140681	-0.0295777	-0.0358524	0.530811	0.502857
445.05271 m/z ± 0.00565 Da	445.05271			0.0731696	-0.0240137	-0.0274301	0.526042	0.502632
426.0181 m/z ± 0.00197 Da	426.0181			-0.0611978	-0.0205947	-0.025022	0.505208	0.502632
536.1257 m/z ± 0.00565 Da	536.1257			-0.0568366	-0.0148038	-0.0169911	0.5	0.502632
386.12962 m/z ± 0.00565 Da	386.12962			-0.0685446	-0.0205301	-0.0250999	0.5	0.502632
383.14279 m/z ± 0.00565 Da	383.14279			-0.10147	-0.0310152	-0.0340326	0.5	0.502632
327.17976 m/z ± 0.00565 Da	327.17976			-0.0976331	-0.0293961	-0.0341636	0.5	0.502632
497.16651 m/z ± 0.00565 Da	497.16651			-0.108621	-0.0339401	-0.0390013	0.5	0.502632
323.02673 m/z ± 0.00075 Da	323.02673			0.00724516	-0.0367761	-0.0380405	0.532566	0.501873
325.18194 m/z ± 0.00115 Da	325.18194			-0.0900501	-0.0281657	-0.0312497	0.5	0.50156
255.23156 m/z ± 0.00071 Da	255.23156			-0.00460154	-0.0298657	-0.0357372	0.542105	0.501548
344.04041 m/z ± 0.00565 Da	344.04041			0.057915	-0.0308714	-0.0352211	0.526042	0.501316
864.56701 m/z ± 0.00565 Da	864.56701			0.0171147	-0.0219373	-0.0258584	0.520833	0.501316
337.1839 m/z ± 0.00565 Da	337.1839			-0.0733026	-0.0217696	-0.0251811	0.5	0.501316
313.16449 m/z ± 0.00565 Da	313.16449			-0.091864	-0.0281114	-0.031951	0.5	0.501316
387.15274 m/z ± 0.00565 Da	387.15274			-0.089528	-0.0279449	-0.0327817	0.5	0.501316
288.04459 m/z ± 0.00565 Da	288.04459			-0.0936647	-0.0294209	-0.0343647	0.5	0.501316
417.2104 m/z ± 0.00565 Da	417.2104			-0.0977482	-0.0302471	-0.0344908	0.5	0.501316
323.16841 m/z ± 0.00565 Da	323.16841			-0.103493	-0.0321035	-0.0367712	0.5	0.501316
581.30223 m/z ± 0.00366 Da	581.30223			0.00651565	-0.0125668	-0.0182981	0.515735	0.500883
403.99786 m/z ± 0.00565 Da	403.99786			-0.0436596	-0.0451106	-0.0543507	0.53125	0.500451
522.0423 m/z ± 0.00565 Da	522.0423			0.0406753	-0.0230139	-0.0263751	0.536458	0.5
753.41684 m/z ± 0.00565 Da	753.41684			0.0240558	-0.027931	-0.0319189	0.526042	0.5
384.00049 m/z ± 0.00565 Da	384.00049			0.0685388	-0.0187571	-0.0210307	0.520833	0.5
424.00592 m/z ± 0.00565 Da	424.00592			-0.0332539	-0.0198947	-0.0234086	0.515625	0.5
406.96648 m/z ± 0.00565 Da	406.96648			-0.0237861	-0.0178387	-0.0199834	0.505208	0.5
364.66993 m/z ± 0.00565 Da	364.66993			-0.0499349	-0.0157614	-0.0184309	0.5	0.5
370.6616 m/z ± 0.00565 Da	370.6616			-0.0505994	-0.0159711	-0.0184765	0.5	0.5
547.1918 m/z ± 0.00565 Da	547.1918			-0.0514083	-0.0162264	-0.0190925	0.5	0.5
385.10119 m/z ± 0.00565 Da	385.10119			-0.054434	-0.0171815	-0.0191458	0.5	0.5
399.11689 m/z ± 0.00403 Da	399.11689			-0.055849	-0.0176281	-0.0202506	0.5	0.5
385.15044 m/z ± 0.00241 Da	385.15044			-0.0550636	-0.0173802	-0.0203283	0.5	0.5
520.1525 m/z ± 0.00565 Da	520.1525			-0.0614439	-0.0193941	-0.0205178	0.5	0.5
341.19552 m/z ± 0.00565 Da	341.19552			-0.0577635	-0.0182324	-0.0205363	0.5	0.5
314.72563 m/z ± 0.00565 Da	314.72563			-0.0551552	-0.0175958	-0.0207038	0.5	0.5
280.78387 m/z ± 0.00565 Da	280.78387			-0.0571791	-0.0180479	-0.0209663	0.5	0.5
357.11466 m/z ± 0.00565 Da	357.11466			-0.0570513	-0.0180076	-0.0211883	0.5	0.5
282.78098 m/z ± 0.00565 Da	282.78098			-0.0584896	-0.0184616	-0.0212594	0.5	0.5
311.17142 m/z ± 0.0014 Da	311.17142			-0.0603638	-0.0190531	-0.0218392	0.5	0.5
366.66719 m/z ± 0.00565 Da	366.66719			-0.0612328	-0.0193763	-0.0223968	0.5	0.5
368.66388 m/z ± 0.00565 Da	368.66388			-0.06174	-0.0195438	-0.0227023	0.5	0.5
449.10024 m/z ± 0.00565 Da	449.10024			-0.0684709	-0.0216121	-0.0243275	0.5	0.5
397.15887 m/z ± 0.00565 Da	397.15887			-0.0679546	-0.0214491	-0.0245374	0.5	0.5
483.15109 m/z ± 0.00565 Da	483.15109			-0.0682559	-0.0215442	-0.0246841	0.5	0.5
254.77009 m/z ± 0.00492 Da	254.77009			-0.0695265	-0.0219452	-0.0251014	0.5	0.5
325.18729 m/z ± 0.00153 Da	325.18729			-0.0720271	-0.0227345	-0.0251691	0.5	0.5
474.17183 m/z ± 0.00565 Da	474.17183			-0.0705562	-0.0223618	-0.0263115	0.5	0.5
321.01888 m/z ± 0.00565 Da	321.01888			-0.0744462	-0.0234981	-0.0274512	0.5	0.5
423.06572 m/z ± 0.00565 Da	423.06572			-0.0766182	-0.0241837	-0.0274688	0.5	0.5
571.09001 m/z ± 0.00565 Da	571.09001			-0.0782108	-0.0246863	-0.0276432	0.5	0.5
258.76421 m/z ± 0.00483 Da	258.76421			-0.0775245	-0.0245647	-0.0280887	0.5	0.5
437.0816 m/z ± 0.00565 Da	437.0816			-0.0776719	-0.0245162	-0.0281142	0.5	0.5
384.11443 m/z ± 0.00565 Da	384.11443			-0.0759867	-0.024304	-0.0285967	0.5	0.5
498.16961 m/z ± 0.00565 Da	498.16961			-0.081164	-0.0256185	-0.0291239	0.5	0.5
380.10687 m/z ± 0.00565 Da	380.10687			-0.0792301	-0.0250081	-0.0292721	0.5	0.5
256.76685 m/z ± 0.005 Da	256.76685			-0.0836785	-0.0265766	-0.0305825	0.5	0.5
421.06846 m/z ± 0.00565 Da	421.06846			-0.0905696	-0.0285872	-0.0326498	0.5	0.5
435.08404 m/z ± 0.00565 Da	435.08404			-0.0923407	-0.0291463	-0.0332787	0.5	0.5
309.15319 m/z ± 0.00565 Da	309.15319			-0.0983253	-0.0311494	-0.0350473	0.5	0.5
284.26605 m/z ± 0.00073 Da	284.26605			-0.00595076	0.00959162	0.0071449	0.484211	0.499981
416.22876 m/z ± 0.00565 Da	416.22876			0.058589	-0.0539767	-0.0696467	0.670504	0.49953
410.23888 m/z ± 0.00565 Da	410.23888			0.0170162	-0.0459739	-0.0550617	0.557895	0.499342
311.16653 m/z ± 0.00105 Da	311.16653			-0.0733688	-0.0236611	-0.0268342	0.505208	0.498929
298.15651 m/z ± 0.00565 Da	298.15651			-0.102312	-0.0196392	-0.0238688	0.5	0.49792
447.21526 m/z ± 0.00565 Da	447.21526			0.00999923	-0.0274603	-0.032166	0.526042	0.497619
431.2197 m/z ± 0.00565 Da	431.2197			0.0134711	-0.0202467	-0.0243572	0.515625	0.497619
885.53167 m/z ± 0.00565 Da	885.53167			-0.0327934	0.00678178	-0.00656777	0.494518	0.497343
347.04006 m/z ± 0.00565 Da	347.04006			0.0288422	0.00381479	0.0347366	0.525713	0.497137
463.3022 m/z ± 0.00565 Da	463.3022			-0.0019774	-0.0358187	-0.0485168	0.526206	0.497099
277.2172 m/z ± 0.00565 Da	277.2172			0.0337374	-0.0284277	-0.0352188	0.526042	0.496541
774.52734 m/z ± 0.00565 Da	774.52734			0.00773117	-0.0255529	-0.0318944	0.510417	0.496541
335.17635 m/z ± 0.00565 Da	335.17635			0.0141445	-0.0545898	-0.0641761	0.588542	0.495238
308.10245 m/z ± 0.00565 Da	308.10245			-0.0778071	-0.0279186	-0.0331342	0.505044	0.495238
427.02545 m/z ± 0.00565 Da	427.02545			-0.0581657	-0.0166854	-0.0188624	0.5	0.495238
695.33878 m/z ± 0.00565 Da	695.33878			-0.0134996	-0.0229974	-0.0271661	0.49989	0.495238
434.26697 m/z ± 0.00565 Da	434.26697			0.0198491	-0.0358686	-0.041765	0.547368	0.494154
279.23153 m/z ± 0.0007 Da	279.23153			-0.00740086	-0.0163544	-0.0243264	0.509265	0.494104
307.09525 m/z ± 0.00187 Da	307.09525			0.0291499	-0.0581788	-0.0694526	0.619518	0.493233
498.28968 m/z ± 0.00565 Da	498.28968			-0.0293469	-0.0167517	-0.0199548	0.494737	0.492857
281.24709 m/z ± 0.00071 Da	281.24709			0.0130205	0.00531405	0.000581981	0.472971	0.491378
400.00668 m/z ± 0.00565 Da	400.00668			0.105671	0.0259809	0.0236121	0.507292	0.490508
516.29047 m/z ± 0.00565 Da	516.29047			-0.0278392	-0.0136881	-0.0156048	0.494737	0.490476
510.25203 m/z ± 0.00565 Da	510.25203			-0.0158724	-0.0172904	-0.0204788	0.494737	0.490476
426.02203 m/z ± 0.00197 Da	426.02203			-0.0655579	-0.00556436	-0.0130495	0.437226	0.488622
597.30364 m/z ± 0.00565 Da	597.30364			0.00115886	-0.0359629	-0.0442548	0.54682	0.488421
578.34599 m/z ± 0.00565 Da	578.34599			0.000334622	-0.0581302	-0.0650527	0.612226	0.488315
370.1322 m/z ± 0.00124 Da	370.1322			-0.0207739	0.0023309	-0.000957729	0.559649	0.486867
794.50566 m/z ± 0.00565 Da	794.50566			0.00265561	-0.0165637	-0.00243035	0.504989	0.486203
516.27892 m/z ± 0.00565 Da	516.27892			-0.0224322	-0.0166919	-0.0200193	0.494737	0.485714
496.2741 m/z ± 0.00565 Da	496.2741			-0.0206881	-0.0164047	-0.0202112	0.494737	0.485714
505.98739 m/z ± 0.00565 Da	505.98739			-0.0974154	-0.0283556	-0.0338227	0.489474	0.485714
283.26269 m/z ± 0.00087 Da	283.26269			0.000576249	-0.0172111	-0.0248496	0.552686	0.485514
480.3047 m/z ± 0.0025 Da	480.3047			-0.0178821	0.00123635	-0.00536781	0.541118	0.485445
309.20702 m/z ± 0.00565 Da	309.20702			0.0371605	-0.0584012	-0.0684057	0.619956	0.483333
1383.83145 m/z ± 0.08295 Da	1383.8314			-0.00606386	0.00971826	0.0155754	0.442544	0.482926
837.54766 m/z ± 0.00565 Da	837.54766			0.0576279	-0.061604	-0.0754681	0.61716	0.482218
297.24348 m/z ± 0.00565 Da	297.24348			-0.00587946	-0.022473	-0.0286534	0.526206	0.480952
257.14246 m/z ± 0.00565 Da	257.14246			-0.0182631	-0.0192382	-0.0225792	0.510197	0.480952
513.27156 m/z ± 0.00565 Da	513.27156			-0.0136479	-0.0193491	-0.0233458	0.510197	0.480952
535.12323 m/z ± 0.00565 Da	535.12323			-0.0978262	-0.0381118	-0.0446809	0.509759	0.48057
749.38559 m/z ± 0.00565 Da	749.38559			-0.00481231	-0.0242666	-0.0311091	0.530318	0.478922
514.28348 m/z ± 0.00565 Da	514.28348			-0.00297312	-0.024666	-0.0282432	0.583279	0.477506
535.30315 m/z ± 0.00565 Da	535.30315			-0.0284575	0.00215795	0.00421305	0.483936	0.476779
697.47983 m/z ± 0.00565 Da	697.47983			0.164338	-0.0826697	-0.104578	0.904934	0.475758
480.30969 m/z ± 0.0025 Da	480.30969			0.0840633	0.091318	0.104013	0.175877	0.474154
401.14077 m/z ± 0.00174 Da	401.14077			-0.0383065	-0.00186909	0.00858223	0.461623	0.474117
256.23629 m/z ± 0.00565 Da	256.23629			0.0309818	-0.0727029	-0.0897428	0.657895	0.47292
385.14295 m/z ± 0.00134 Da	385.14295			-0.0721847	-0.0242482	-0.0320576	0.48761	0.469875
463.97805 m/z ± 0.00565 Da	463.97805			0.0243789	-0.0280332	-0.039237	0.577632	0.469204
634.40771 m/z ± 0.00565 Da	634.40771			0.0370079	-0.0905905	-0.107274	0.694243	0.465526
384.98399 m/z ± 0.00565 Da	384.98399			0.0948748	-0.138471	-0.160346	0.944956	0.465414
437.26373 m/z ± 0.00173 Da	437.26373			0.00080317	0.0107164	0.00200922	0.479112	0.460846
401.24594 m/z ± 0.00565 Da	401.24594			0.0253829	-0.0738356	-0.0869563	0.710471	0.457694
863.56446 m/z ± 0.00565 Da	863.56446			0.11862	-0.0839278	-0.103325	0.705373	0.45713
669.36142 m/z ± 0.00565 Da	669.36142			-0.010658	-0.0184355	-0.0270781	0.508004	0.455564
716.52088 m/z ± 0.00565 Da	716.52088			0.0111129	0.0472829	0.0421814	0.494518	0.454937
515.28789 m/z ± 0.00565 Da	515.28789			-0.00562151	-0.0244092	-0.0289187	0.562061	0.454762
512.26835 m/z ± 0.00565 Da	512.26835			-0.00021507	-0.024837	-0.0298121	0.552412	0.4526
346.0534 m/z ± 0.0013 Da	346.0534			0.00011541	0.000827602	-0.00534515	0.458717	0.447638
481.31275 m/z ± 0.00565 Da	481.31275			0.0610994	0.0624622	0.0550387	0.309923	0.442776
307.099 m/z ± 0.00187 Da	307.099 m			-0.0248186	0.000130127	0.00532649	0.447039	0.441717
303.13345 m/z ± 0.00565 Da	303.13345			-0.0396782	0.0133752	0.0269426	0.429441	0.43958
763.40318 m/z ± 0.00565 Da	763.40318			0.00554553	-0.0413796	-0.0569066	0.580318	0.43468
420.25978 m/z ± 0.00128 Da	420.25978			0.094938	0.112703	0.141195	0.14523	0.431942
383.13007 m/z ± 0.00565 Da	383.13007			-0.0526094	-0.0243579	-0.0273189	0.547204	0.41213
284.26751 m/z ± 0.00073 Da	284.26751			0.0982571	0.0847572	0.0998779	0.25943	0.405833
862.55079 m/z ± 0.00565 Da	862.55079			0.14467	-0.163433	-0.204524	0.894353	0.40369
282.25201 m/z ± 0.00565 Da	282.25201			0.129107	0.0772847	0.0812491	0.389748	0.402299
419.25615 m/z ± 0.00127 Da	419.25615	CPA(18:0/0:0)	Lipid	0.0953027	0.124772	0.155596	0.0908443	0.399668
283.26443 m/z ± 0.00087 Da	283.26443	not identified		0.0981042	0.0910187	0.10672	0.216393	0.397932
725.38574 m/z ± 0.00565 Da	725.38574	not identified		0.0472443	-0.0527682	-0.0703856	0.633388	0.397525
835.53186 m/z ± 0.00565 Da	835.53186	not identified		0.13133	-0.127363	-0.15939	0.837774	0.390971
671.46404 m/z ± 0.00565 Da	671.46404	PA(18:1(9Z)-O(12,13)/P-16:0)	Lipid	0.152757	-0.137387	-0.167844	0.887007	0.385746
701.51028 m/z ± 0.00565 Da	701.51028	PA(22:1(13Z)/14:0)	Lipid	-0.00148272	0.0668014	0.123452	0.375548	0.375482
438.27025 m/z ± 0.00565 Da	438.27025	not identified		0.0701405	0.0767862	0.0837953	0.294956	0.374198
281.24851 m/z ± 0.00071 Da	281.24851	not identified		0.124394	0.0869127	0.0960049	0.294298	0.36849
433.23605 m/z ± 0.00565 Da	433.23605	LysoPA(0:0/18:2(9Z,12Z))	Lipid	0.0914286	-0.0941219	-0.122287	0.777083	0.365501
462.29866 m/z ± 0.00565 Da	462.29866	LysoPE(P-18:1(9Z)/0:0)	Lipid	0.110686	-0.00319379	-0.00949329	0.660526	0.364975
442.01631 m/z ± 0.00565 Da	442.01631	Guanosine diphosphate (GDP)	Signaling Molecule	0.0310727	-0.148621	-0.176653	0.81557	0.357751
436.28313 m/z ± 0.00565 Da	436.28313	LysoPE(P-16:0/0:0)	Lipid	0.0385942	0.0230725	0.018927	0.496765	0.355207
375.23026 m/z ± 0.00565 Da	375.23026	not identified		0.103844	-0.0322857	-0.0234774	0.807237	0.351353
304.03402 m/z ± 0.00565 Da	304.03402	Cytidine 2',3'-cyclic phosphate	Nucleotide	0.201254	-0.118767	-0.133978	0.95625	0.343333
478.29377 m/z ± 0.00565 Da	478.29377	LysoPE(18:1(11Z)/0:0)	Lipid	0.0857963	-0.0517182	-0.0725988	0.689254	0.335915
305.01785 m/z ± 0.00565 Da	305.01785	Uridine 2',3'-cyclic phosphate	Nucleotide	0.16227	-0.13109	-0.148534	0.905318	0.334511
718.5373 m/z ± 0.00565 Da	718.5373	Glycerophospholipid	Lipid	0.0669105	-0.0607584	-0.0706795	0.599123	0.333722
600.32336 m/z ± 0.00565 Da	600.32336	not identified		0.0513245	-0.0672473	-0.0911511	0.651809	0.329981
209.62855 m/z ± 0.00565 Da	209.62855	not identified		0.0222533	0.0598711	0.0577501	0.360417	0.328534
861.54755 m/z ± 0.00565 Da	861.54755	Phosphatidylglycerol (PG)		0.174949	-0.173827	-0.213995	0.948355	0.322061
322.04438 m/z ± 0.00565 Da	322.04438	Cytidine 3'-monophosphate (CMP)	Nucleotide	0.154299	-0.130837	-0.147166	0.893311	0.316892
418.24403 m/z ± 0.00565 Da	418.24403	not identified		0.0978838	-0.107497	-0.136796	0.808553	0.315
713.35111 m/z ± 0.00565 Da	713.35111	not identified		0.0619136	-0.1075	-0.131854	0.719408	0.314799
697.35517 m/z ± 0.00565 Da	697.35517	not identified		0.0890942	-0.0667204	-0.074036	0.792654	0.314731
371.07468 m/z ± 0.00565 Da	371.07468	Sulindac sulfone	Cell Component	0.0497457	-0.0928741	-0.121323	0.750713	0.309605
673.48002 m/z ± 0.00565 Da	673.48002	PA(20:1(11Z)/14:0)	Lipid	0.101186	0.0913697	0.0975727	0.297752	0.309373
698.35896 m/z ± 0.00565 Da	698.35896	not identified		0.0830451	-0.103974	-0.131347	0.783607	0.307901
540.05334 m/z ± 0.00565 Da	540.05334	cADP-ribose [M-H20-H]	Signaling Molecule	0.096524	-0.174521	-0.209862	0.905592	0.306685
437.26719 m/z ± 0.00173 Da	437.26719	Lyso phosphatidic acid (18:0/0:0)		0.0825852	0.143588	0.177103	0.131469	0.302487
408.0112 m/z ± 0.00565 Da	408.0112	ADP [M-H20]	Signaling Molecule	0.0545543	-0.108408	-0.137224	0.884814	0.293803
582.3115 m/z ± 0.00565 Da	582.3115	not identified		0.0640875	-0.0497674	-0.0772599	0.608553	0.285338
599.31945 m/z ± 0.00565 Da	599.31945	LysoPI(0:0/18:0)	Lipid	0.103417	-0.0307776	-0.0385771	0.76568	0.284054
723.37042 m/z ± 0.00565 Da	723.37042	not identified		0.0470074	-0.0492273	-0.0693589	0.635143	0.28401
362.23713 m/z ± 0.00565 Da	362.23713	N-Palmitoyltaurine	Lipid	-0.0908194	0.0399633	0.0415568	0.395066	0.279962
328.04528 m/z ± 0.00565 Da	328.04528	cAMP	Signaling Molecule	0.120967	-0.162724	-0.195287	0.878399	0.271623
255.23297 m/z ± 0.00071 Da	255.23297	4-methylpentadecanoic acid	Lipid	0.111537	-0.117012	-0.137251	0.930976	0.269023
753.382 m/z ± 0.00565 Da	753.382 m	not identified		0.0664984	-0.072584	-0.0980216	0.666996	0.267055
293.21213 m/z ± 0.00565 Da	293.21213	not identified		0.164796	-0.192536	-0.234453	0.950658	0.253766
259.02236 m/z ± 0.00565 Da	259.02236	Fructose 6 phosphate	Glucose Metabolite	0.0790888	-0.093617	-0.126667	0.733443	0.247951
311.22281 m/z ± 0.00565 Da	311.22281	not identified		0.153418	-0.145627	-0.184395	0.872094	0.244944
295.22789 m/z ± 0.00565 Da	295.22789	Linoleic acid derivative	Lipid	0.156236	-0.167126	-0.20891	0.932566	0.232387
417.24056 m/z ± 0.00126 Da	417.24056	CPA(18:1(9Z)/0:0)	Lipid	0.133236	-0.10119	-0.112687	0.949671	0.232325
297.03823 m/z ± 0.00565 Da	297.03823	not identified		0.105937	-0.0669096	-0.0934037	0.827193	0.232105
581.30955 m/z ± 0.00366 Da	581.30955	not identified		0.107227	-0.021634	-0.0325896	0.78443	0.227444
392.22854 m/z ± 0.00565 Da	392.22854	not identified		0.139179	-0.143009	-0.170469	0.945614	0.226504
452.27791 m/z ± 0.00565 Da	452.27791	LysoPE(16:0/0:0)	Lipid	0.140312	-0.0760752	-0.10581	0.779441	0.226046
357.05897 m/z ± 0.00565 Da	357.05897	not identified		0.101304	-0.0825428	-0.109673	0.818421	0.209706
409.23593 m/z ± 0.00565 Da	409.23593	LysoPA(0:0/16:0)	Lipid	0.125638	-0.108548	-0.126075	0.934265	0.193828
315.04847 m/z ± 0.00565 Da	315.04847	not identified		0.0941133	-0.055232	-0.0715738	0.820833	0.193396
299.05385 m/z ± 0.00565 Da	299.05385	not identified		0.108022	-0.0687837	-0.0915051	0.875219	0.193058
391.22486 m/z ± 0.0011 Da	391.22486	CPA(16:0/0:0)	Lipid	0.139192	-0.149775	-0.1706	0.967325	0.181159
435.25152 m/z ± 0.00565 Da	435.25152	LysoPA(0:0/18:1(9Z))	Lipid	0.123636	-0.0390542	-0.0456396	0.782401	0.180789
